# Supplementary material for: Saponin-based adjuvants enhance antigen cross-presentation in human CD11c+ CD1c+ CD5− CD163+ conventional type 2 dendritic cells
Source: HighWire-hosted journal article supplement (doi:10.1136/jitc-2023-007082), 2023-08-01

## Extended Data Figure 1

A

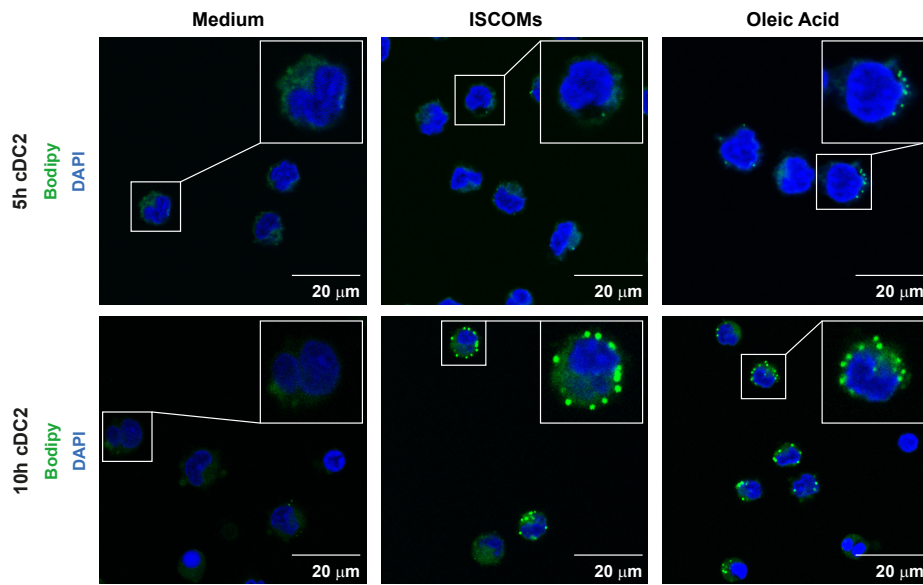

B

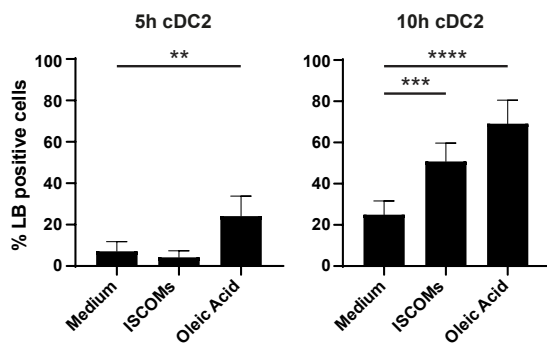

C

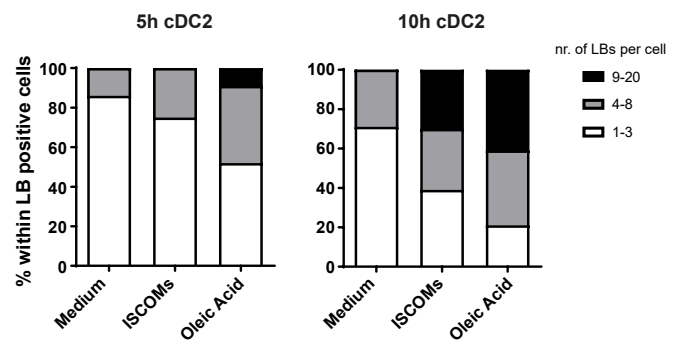

## Extended Data Figure 2

A

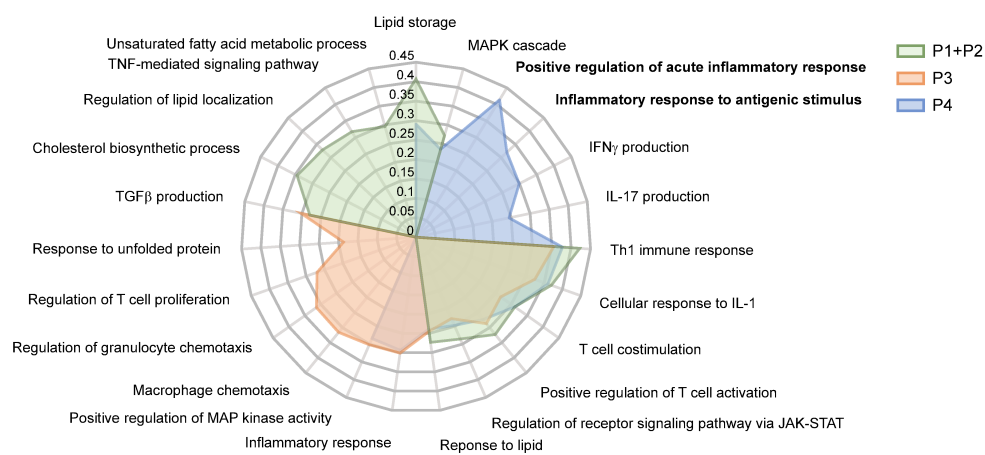

B

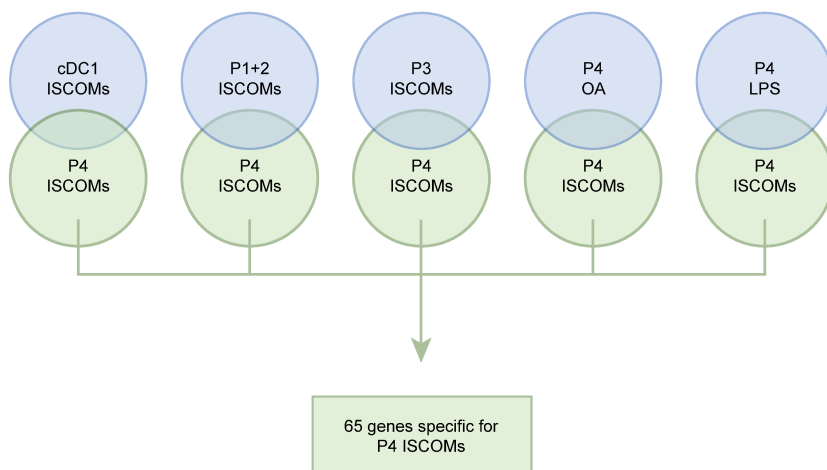

## Extended Data Figure 3

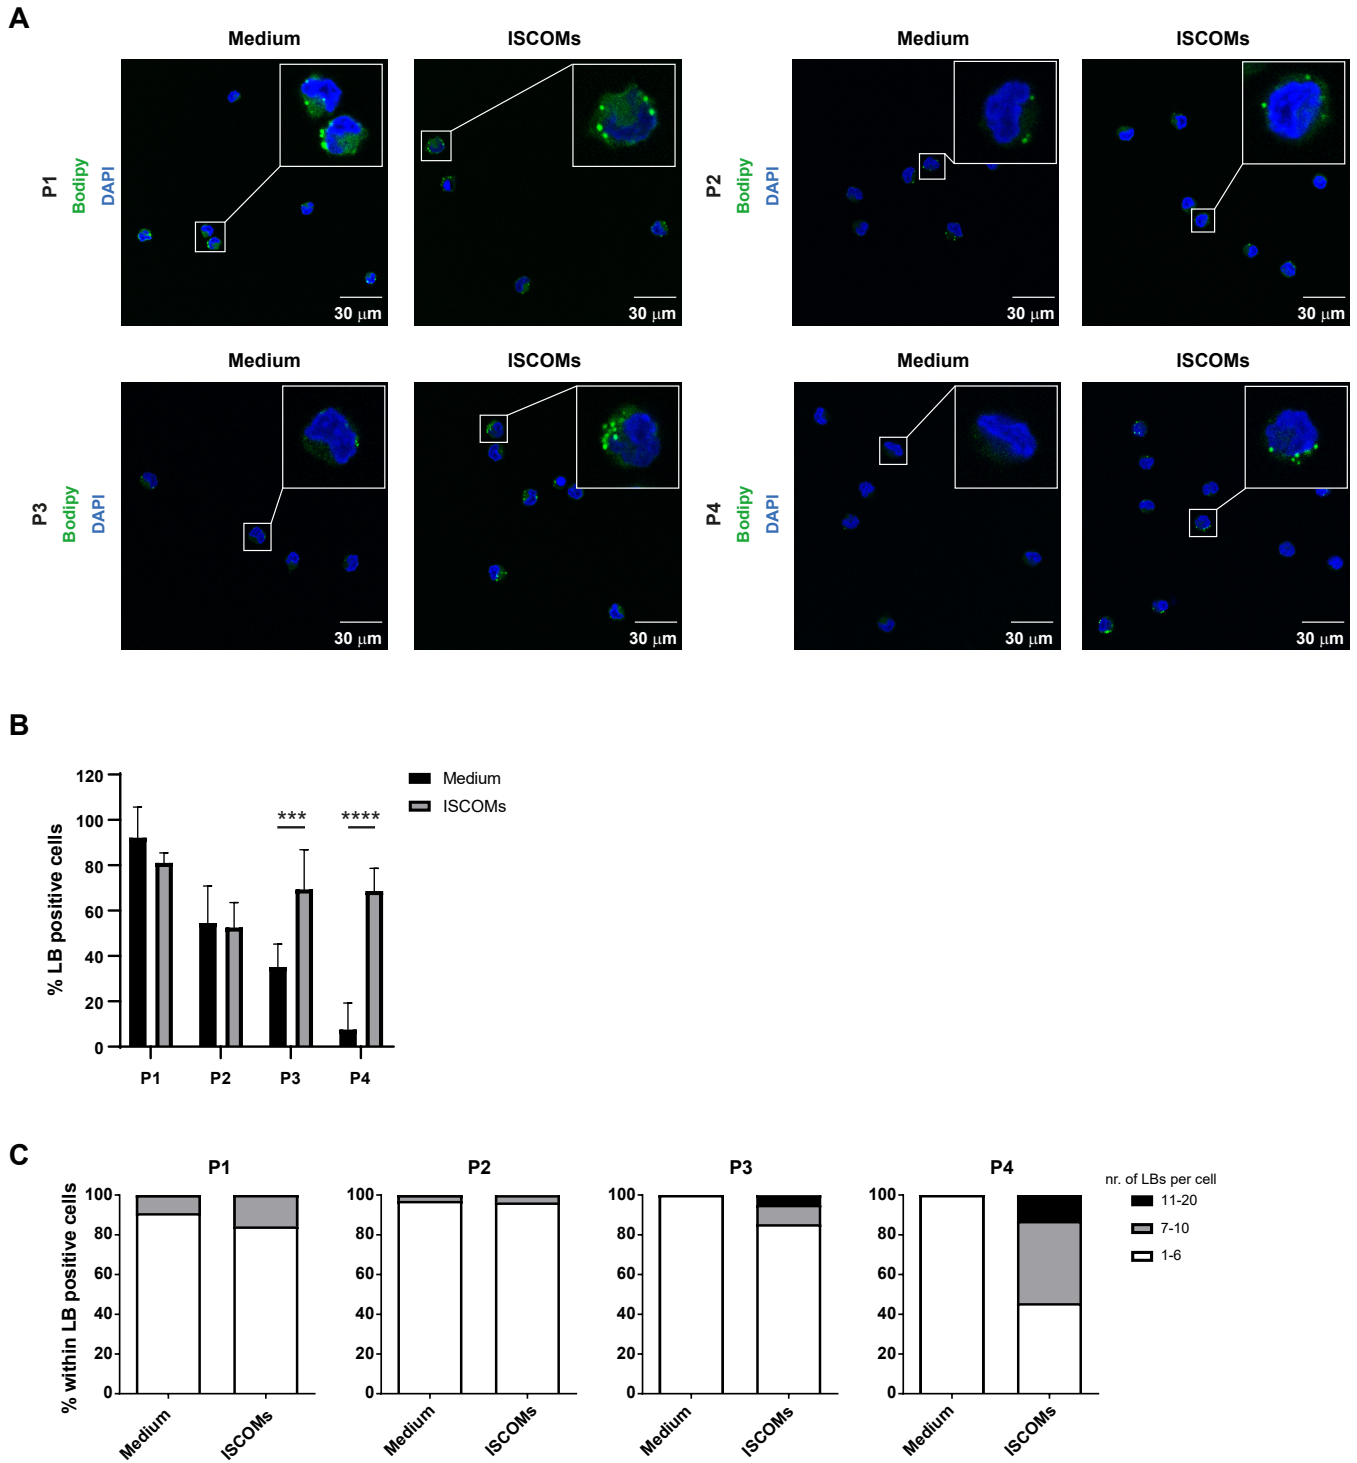

**Extended Data Figure 4**

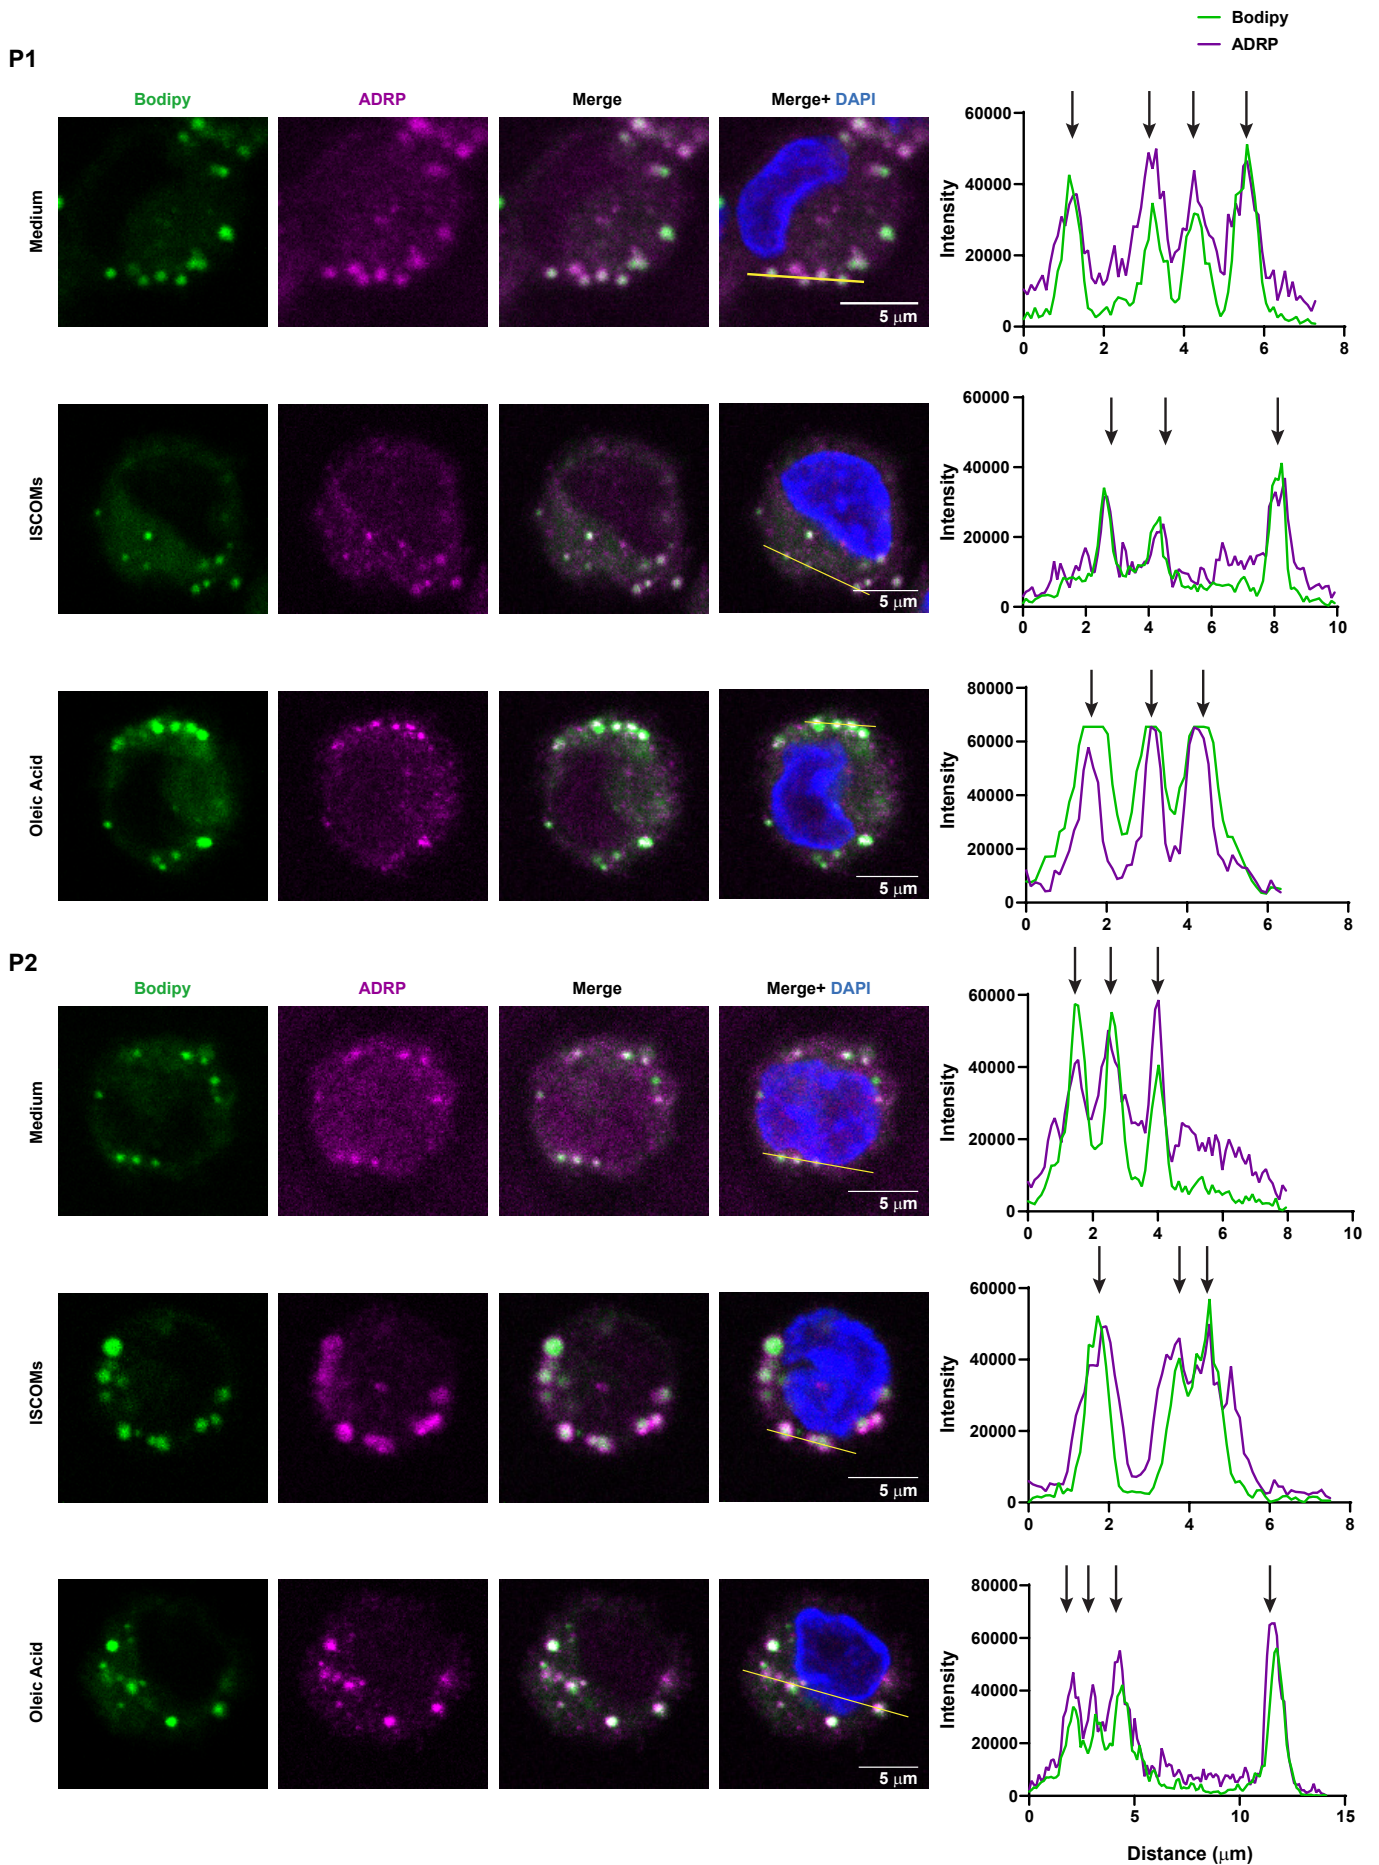

**Extended Data Figure 5**

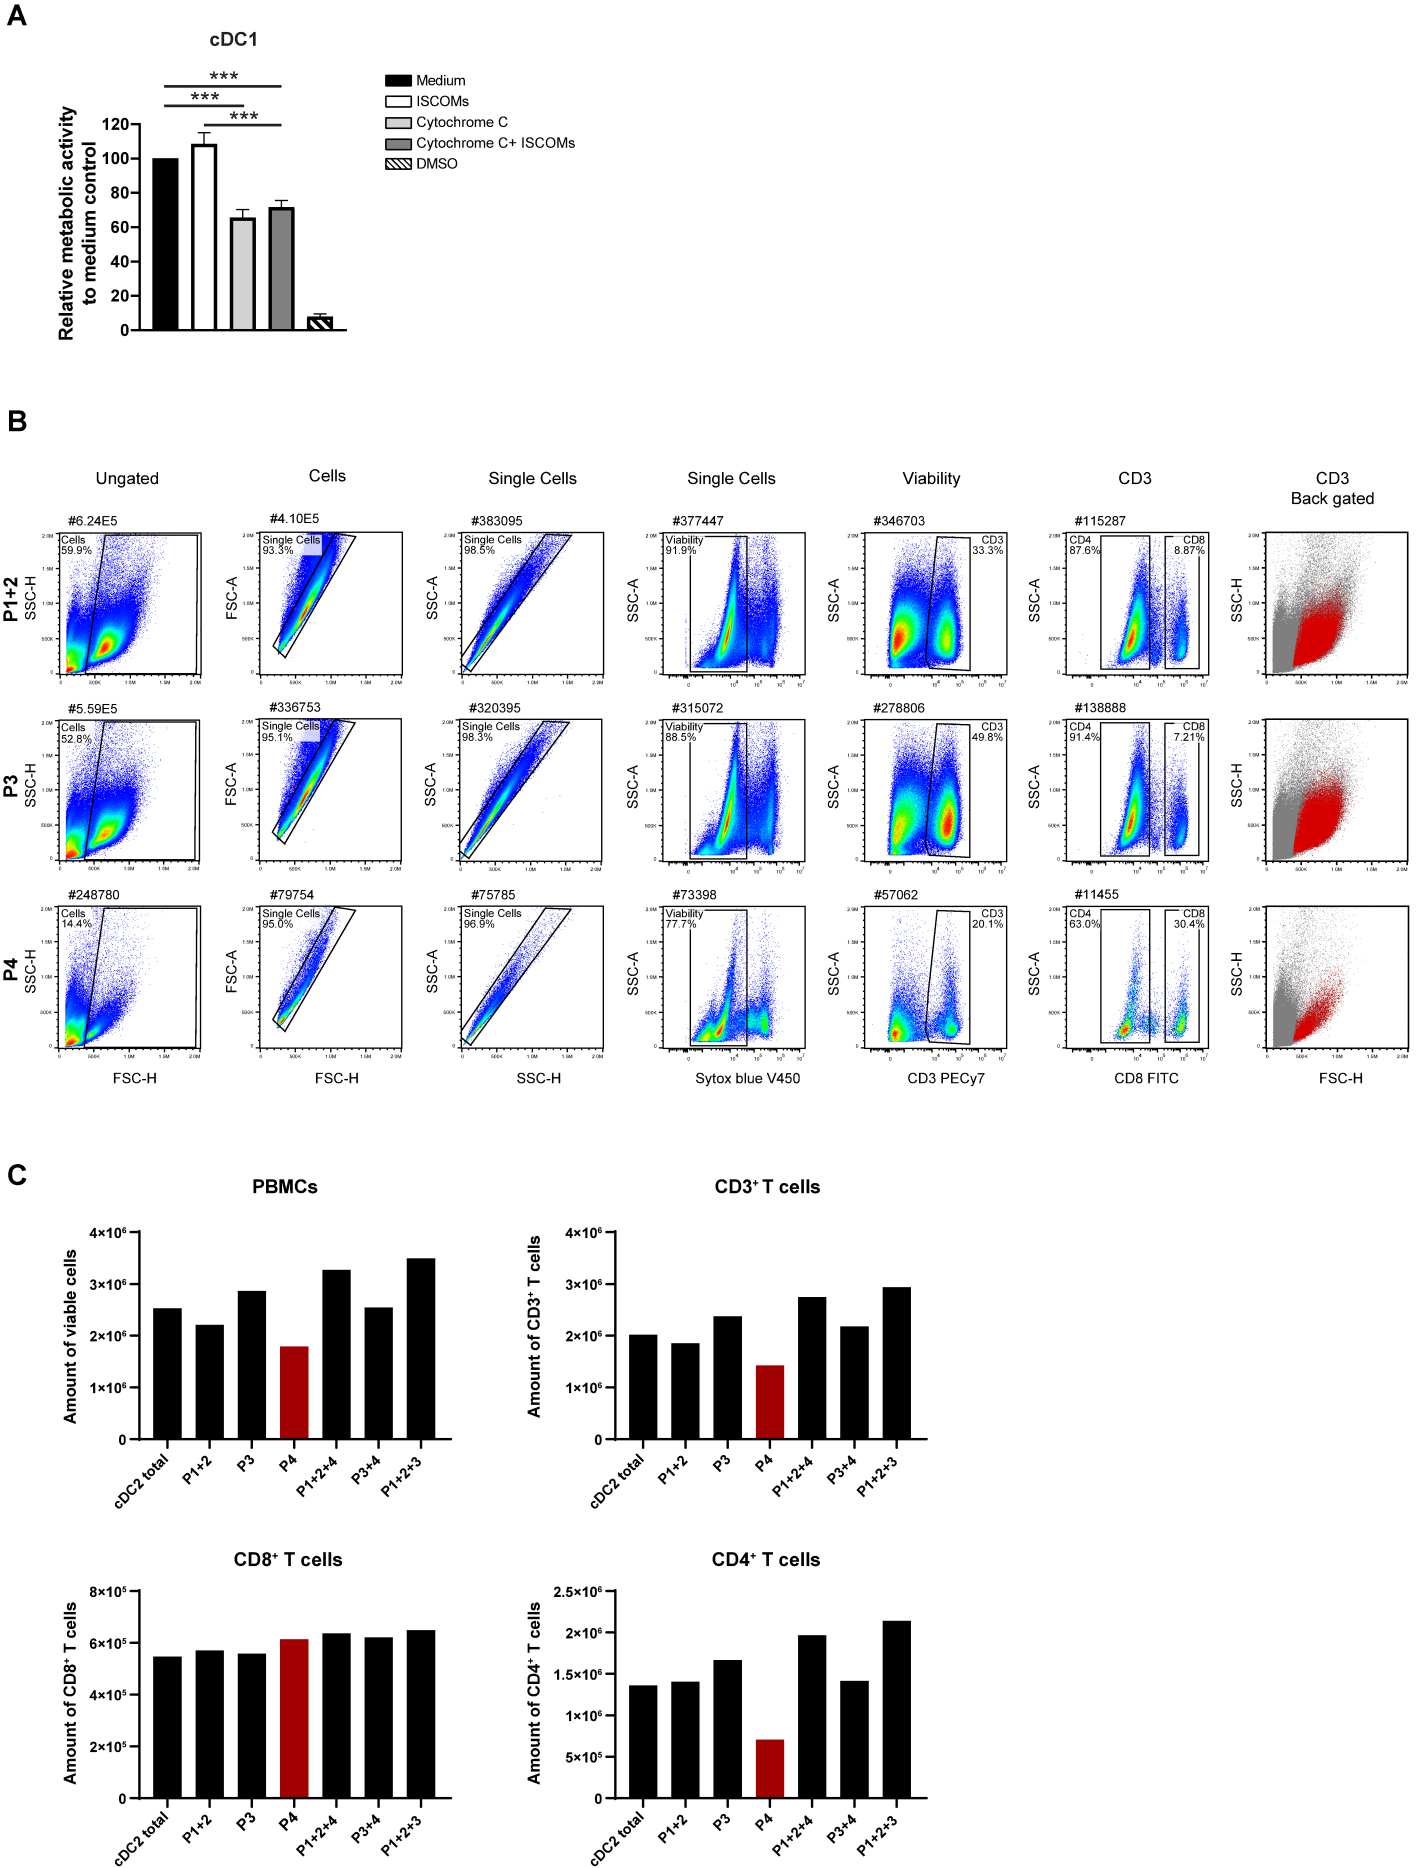

## Extended Data Figure 6

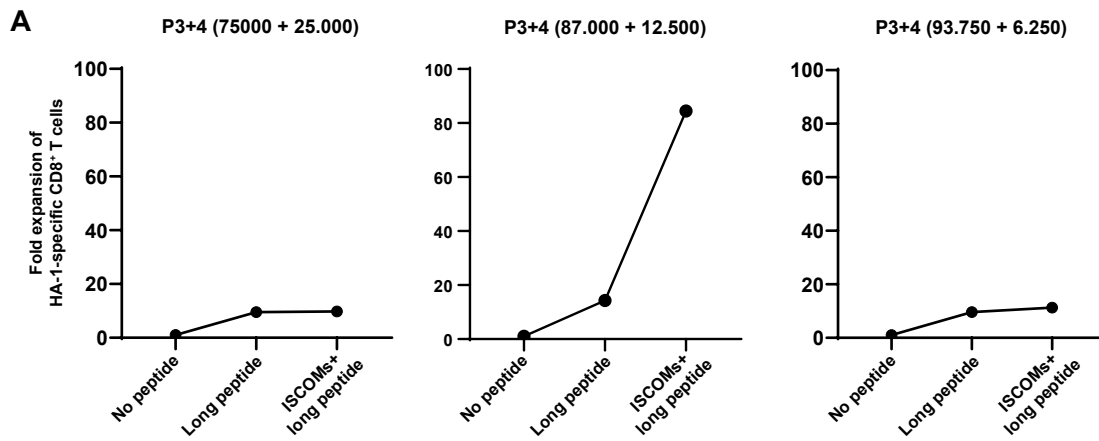

Supplement: jitc-2023-007082supp001_data_supplement.pdf [file jitc-2023-007082supp001_data_supplement.pdf]
